# Supplementary material for: Surface Modification towards Integral Bulk Catalysts of Transition Metal Borides for Hydrogen Evolution Reaction
Source: MDPI journal article supplement (doi:10.3390/catal12020222), 2022-02-16
Supplement: s1 [file s1]

# Surface Modification towards Integral Bulk Catalysts of Transition Metal Borides for Hydrogen Evolution Reaction

Wei Zhao <sup>1</sup>, Dan Xu <sup>1</sup>, Yanli Chen <sup>2,\*</sup>, Jiaen Cheng <sup>1</sup>, Cun You <sup>1</sup>, Xin Wang <sup>1</sup>, Shushan Dong <sup>1</sup>, Qiang Tao <sup>1,\*</sup>, Pinwen Zhu <sup>1,\*</sup>

<sup>1</sup> State Key Laboratory of Superhard Materials, College of Physics, Jilin University, Changchun 130012, China

<sup>2</sup> Key Laboratory of Functional Materials Physics and Chemistry of the Ministry of Education, Jilin Normal University, Changchun 130103, China

\* Correspondence: qiangtao@jlu.edu.cn (Q.T.); ylchen@jlnu.edu.cn (Y.C.); zhupw@jlu.edu.cn (P.Z.)

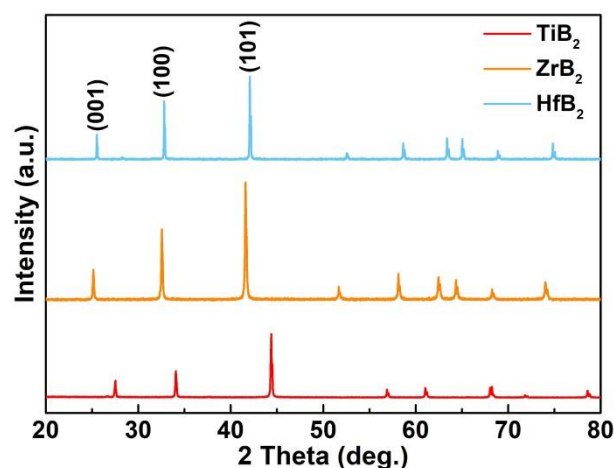

Figure S1. The XRD of commercial TiB<sub>2</sub>, ZrB<sub>2</sub>, and HfB<sub>2</sub>.

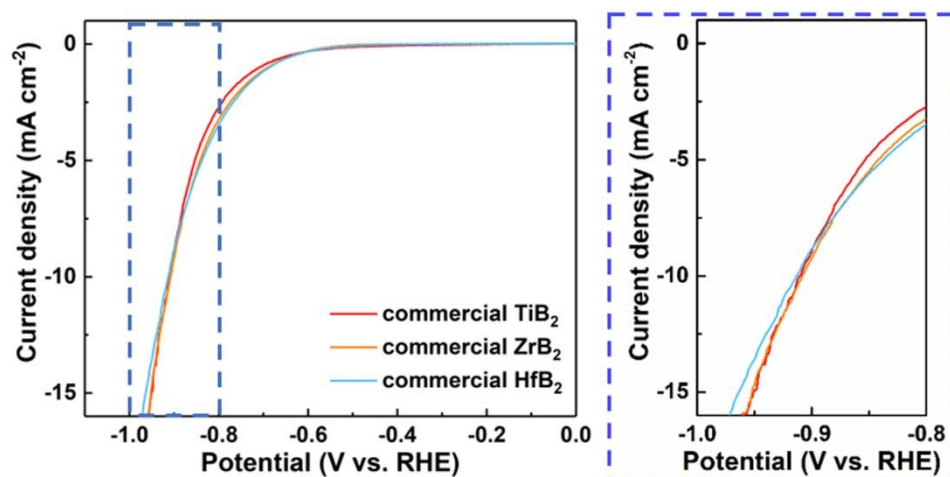

Figure S2. The linear sweep voltammetry (LSV) curves of commercial TiB<sub>2</sub>, ZrB<sub>2</sub>, and HfB<sub>2</sub> for HER in 0.5 M H<sub>2</sub>SO<sub>4</sub> solution.

**Table S1.** Comparison of the catalytic activity of TiB<sub>2</sub>, ZrB<sub>2</sub>, HfB<sub>2</sub> obtained herein with those reported previously. (The Current density is 10 mA cm<sup>-2</sup>.)

| Catalyst                                     | Catalysis condition                      | Overpotential at the corresponding j | Reference        |
|----------------------------------------------|------------------------------------------|--------------------------------------|------------------|
| <b>TiB<sub>2</sub> after HCl etching</b>     | <b>0.5 M H<sub>2</sub>SO<sub>4</sub></b> | <b>346 mV</b>                        | <b>This work</b> |
| TiB <sub>2</sub> @PPy                        | 0.5 M H <sub>2</sub> SO <sub>4</sub>     | 432 mV                               | [1]              |
| TiB <sub>2</sub> after HPHT                  | 0.5 M H <sub>2</sub> SO <sub>4</sub>     | 477 mV                               | This work        |
| TiB <sub>2</sub> powder                      | 0.5 M H <sub>2</sub> SO <sub>4</sub>     | ~490 mV                              | [2]              |
| Commercial TiB <sub>2</sub> powder (~500 nm) | 0.5 M H <sub>2</sub> SO <sub>4</sub>     | 848 mV                               | [1]              |
| Commercial TiB <sub>2</sub>                  | 0.5 M H <sub>2</sub> SO <sub>4</sub>     | 910 mV                               | This work        |
| Commercial TiB <sub>2</sub>                  | 0.5 M H <sub>2</sub> SO <sub>4</sub>     | ~1070 mV                             | [3]              |
| TiB <sub>2</sub> powder                      | 0.5 M H <sub>2</sub> SO <sub>4</sub>     | ~1100 mV                             | [4]              |
| <b>ZrB<sub>2</sub> after HCl etching</b>     | <b>0.5 M H<sub>2</sub>SO<sub>4</sub></b> | <b>542 mV</b>                        | <b>This work</b> |
| ZrB <sub>2</sub> powder                      | 0.5 M H <sub>2</sub> SO <sub>4</sub>     | ~580 mV                              | [2]              |
| ZrB <sub>2</sub> after HPHT                  | 0.5 M H <sub>2</sub> SO <sub>4</sub>     | 627 mV                               | This work        |
| Commercial ZrB <sub>2</sub>                  | 1 M H <sub>2</sub> SO <sub>4</sub>       | 690 mV                               | [5]              |
| ZrB <sub>2</sub> powder                      | 0.5 M H <sub>2</sub> SO <sub>4</sub>     | 700 mV                               | [6]              |
| Commercial ZrB <sub>2</sub>                  | 0.5 M H <sub>2</sub> SO <sub>4</sub>     | 908 mV                               | This work        |
| Commercial ZrB <sub>2</sub>                  | 0.5 M H <sub>2</sub> SO <sub>4</sub>     | ~970 mV                              | [3]              |
| <b>HfB<sub>2</sub> after HCl etching</b>     | <b>0.5 M H<sub>2</sub>SO<sub>4</sub></b> | <b>515 mV</b>                        | <b>This work</b> |
| HfB <sub>2</sub> after HPHT                  | 0.5 M H <sub>2</sub> SO <sub>4</sub>     | 563 mV                               | This work        |
| HfB <sub>2</sub> powder                      | 0.5 M H <sub>2</sub> SO <sub>4</sub>     | ~850 mV                              | [2]              |
| Commercial HfB <sub>2</sub>                  | 0.5 M H <sub>2</sub> SO <sub>4</sub>     | 913 mV                               | This work        |
| Commercial HfB <sub>2</sub>                  | 1 M H <sub>2</sub> SO <sub>4</sub>       | >1000 mV                             | [5]              |
| Commercial HfB <sub>2</sub>                  | 0.5 M H <sub>2</sub> SO <sub>4</sub>     | ~1050 mV                             | [3]              |
